# Supplementary material for: Facile synthesis of Pd–Mn3O4/C as high-efficient electrocatalyst for oxygen evolution reaction
Source: Royal Society of Chemistry journal article supplement (doi:10.1039/c4ta04110k), 2014-01-01
Supplement: c4ta04110k1.pdf [file c4ta04110k1.pdf]

# Supporting Information

## Facile synthesis of Pd-Mn<sub>3</sub>O<sub>4</sub>/C as High-Efficient Electrocatalyst for Oxygen Evolution Reaction

Zhuo-Ying Li,<sup>a</sup> Zi-li Liu,<sup>a</sup> Jie-Cong Liang,<sup>a</sup> Chang-Wei Xu,<sup>a\*</sup> and Xihong Lu,<sup>a,b\*</sup>

<sup>a</sup> Guangzhou Key Laboratory for Environmentally Functional Materials and Technology, School of Chemistry and Chemical Engineering, Guangzhou University, Guangzhou 510006, P. R. China. E-mail: [cwxu@gzhu.edu.cn](mailto:cwxu@gzhu.edu.cn)

<sup>b</sup> MOE of the Key Laboratory of Bioinorganic and Synthetic Chemistry, School of Chemistry and Chemical Engineering, Sun Yat-Sen University, Guangzhou 510275, China. E-mail: [luxh6@mail.sysu.edu.cn](mailto:luxh6@mail.sysu.edu.cn)

### Experimental Section

#### Method

All reagents used were of analytical grade purity and purchased from Sigma-Aldrich. The Mn<sub>3</sub>O<sub>4</sub>/C powders used in this study were prepared by a solid-state reaction by intermittent microwave heating method. The Mn(NO<sub>3</sub>)<sub>2</sub> aqueous solution is mixed with dispersed carbon black (Vulcan XC-72R, Cabot Corp., USA) by dispersed by ultrasonic wave. The precipitate was dried in an oven at 373 K. The mixture was put into a homemade program-controlled microwave oven (1000 W, 2.45 GHz) for heating treatment with a 5 s on and 5 s off procedure for 20 times. The Co<sub>3</sub>O<sub>4</sub>/C powders were prepared with the similar method. The Pt-Mn<sub>3</sub>O<sub>4</sub>/C electrocatalysts were prepared by reduction of H<sub>2</sub>PtCl<sub>6</sub> solution on the Mn<sub>3</sub>O<sub>4</sub>/C powders using an excess 0.01 mol L<sup>-1</sup> NaBH<sub>4</sub> solution. The ratios of Pt and Mn<sub>3</sub>O<sub>4</sub> were controlled by stoichiometric calculation. The Pt/C, Mn<sub>3</sub>O<sub>4</sub>/C, Pt-Mn<sub>3</sub>O<sub>4</sub>/C or Co<sub>3</sub>O<sub>4</sub>/c powders were dispersed in 2-propanol with 5 wt% PTFE (polytetrafluoroethylene) under ultrasonic stirring, then, the catalyst ink was deposited on the surface of a graphite rod with the geometric area of 0.33 cm<sup>2</sup> and dried at 353 K for 30 min. The loadings of carbon black and PTFE on the electrodes were accurately controlled at 0.23 mg cm<sup>-2</sup> and 0.1 mg cm<sup>-2</sup>. The sum of loading for Pt and Mn<sub>3</sub>O<sub>4</sub> or Co<sub>3</sub>O<sub>4</sub> on the electrodes was accurately controlled at 0.1 mg cm<sup>-2</sup>.

#### Characterisation

All electrochemical measurements were tested in a three-electrode cell using the EG&GPAR283 electrochemical work station (Princeton, USA) in a temperature-controlled water-bath (Polyscience 9106,

U.S.A.) at 298 K. Solutions were freshly prepared before each experiment. A platinum foil (3.0 cm<sup>2</sup>) was used as counter electrode. All the potentials were measured versus a saturated calomel electrode (SCE, 0.241 V *versus* NHE) electrode. A salt bridge was used between the cell and the reference electrode.

XRD was carried out with a D/MAX2200 diffractometer employing Cu K $\alpha$  radiation ( $k = 0.15418$  nm). TEM was performed with a Philips CM-300 high resolution system operating at 200 keV. Chemical-state analysis of electrocatalysts was carried out by XPS using an ESCALAB 250 X-ray photoelectron spectrometer. All XPS spectra were corrected using the C 1s line at 284.6 eV. Curve fitting and background subtraction were accomplished.

**Figure S1.** XRD patterns for the Mn<sub>3</sub>O<sub>4</sub>/C, Pd/C and Pd-Mn<sub>3</sub>O<sub>4</sub>(wt 2:1)/C.

X-ray diffraction (XRD) patterns for the Mn<sub>3</sub>O<sub>4</sub>/C, Pd/C and Pd-Mn<sub>3</sub>O<sub>4</sub>(wt 2:1)/C all exhibit an XRD pattern of a typical face-centered-cubic (fcc) lattice structure as shown in Figure 1S. Diffraction peaks at around 25.00° observed in all the samples are assigned to the (002) plane of the carbon. The strong diffraction peaks for manganese oxide support on carbon black at the Bragg angles of 18.04°, 28.97°, 32.43°, 36.15°, 44.42°, 50.81°, 59.98° and 64.68° correspond to the (101), (112), (103), (211), (220), (105), (224) and (400) facets of Mn<sub>3</sub>O<sub>4</sub> crystal. From the XRD result, the phase of the manganese oxides is Mn<sub>3</sub>O<sub>4</sub>. For the pattern of Pd-Mn<sub>3</sub>O<sub>4</sub>(wt 2:1)/C, all of the diffraction peaks of palladium and Mn<sub>3</sub>O<sub>4</sub> are observed indicating their coexistence in the catalysts. And there is no obvious shift in the diffraction peaks of palladium in these catalysts indicating that the addition of Mn<sub>3</sub>O<sub>4</sub> has no effect on the crystalline lattice of palladium.

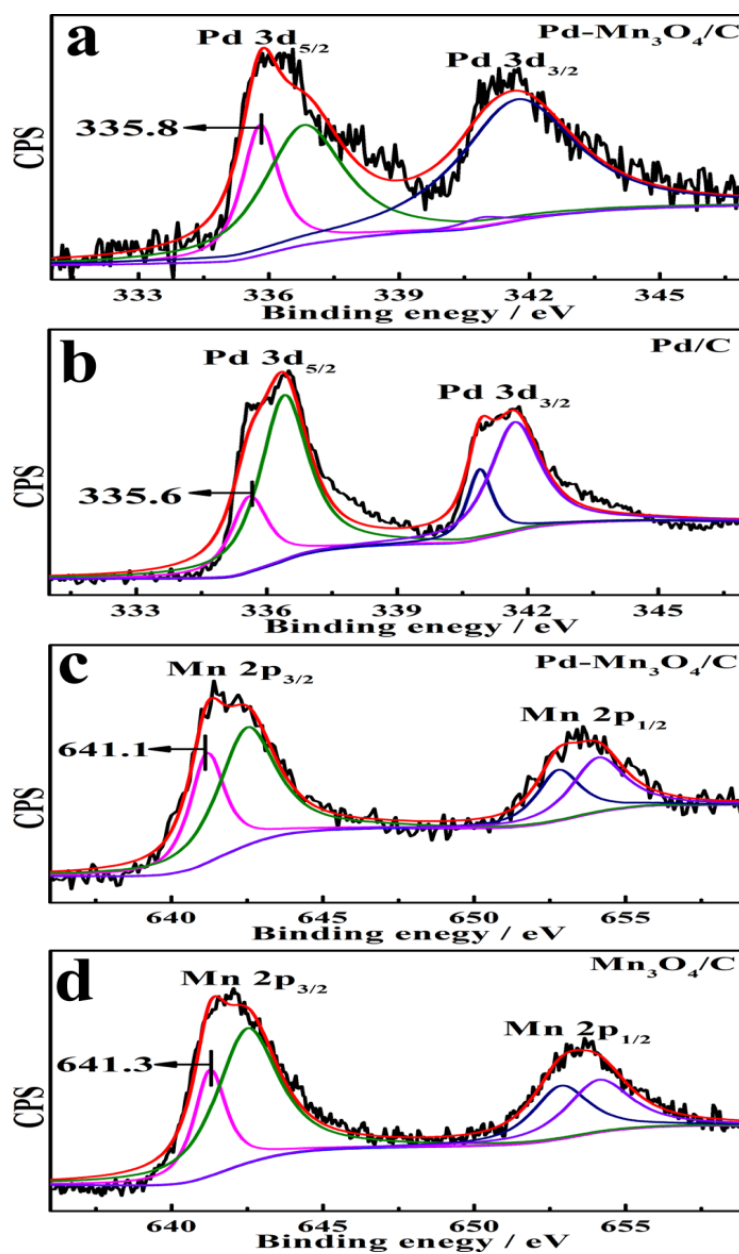

**Figure S2.** Comparison of core level Pd 3d XPS spectra for (a) Pd-Mn<sub>3</sub>O<sub>4</sub>/C and (b) Mn<sub>3</sub>O<sub>4</sub>/C. Comparison of core level Mn 2p XPS spectra for (c) Pd-Mn<sub>3</sub>O<sub>4</sub>/C, (d) pure Mn<sub>3</sub>O<sub>4</sub>/C.
